# Supplementary material for: The Ethylene Precursor ACC Affects Early Vegetative Development Independently of Ethylene Signaling
Source: PubMed Central journal article supplement (PMC6908520; doi:10.3389/fpls.2019.01591), 2019-12-06
Supplement: DataSheet_1.pdf [file DataSheet_1.pdf]

## *Supplementary Material*

### **1 Supplementary Figures and Tables**

#### **1.1 Supplementary Figures**

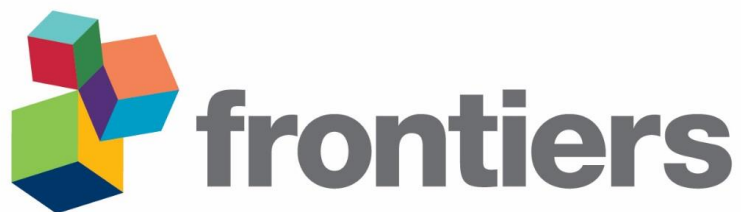

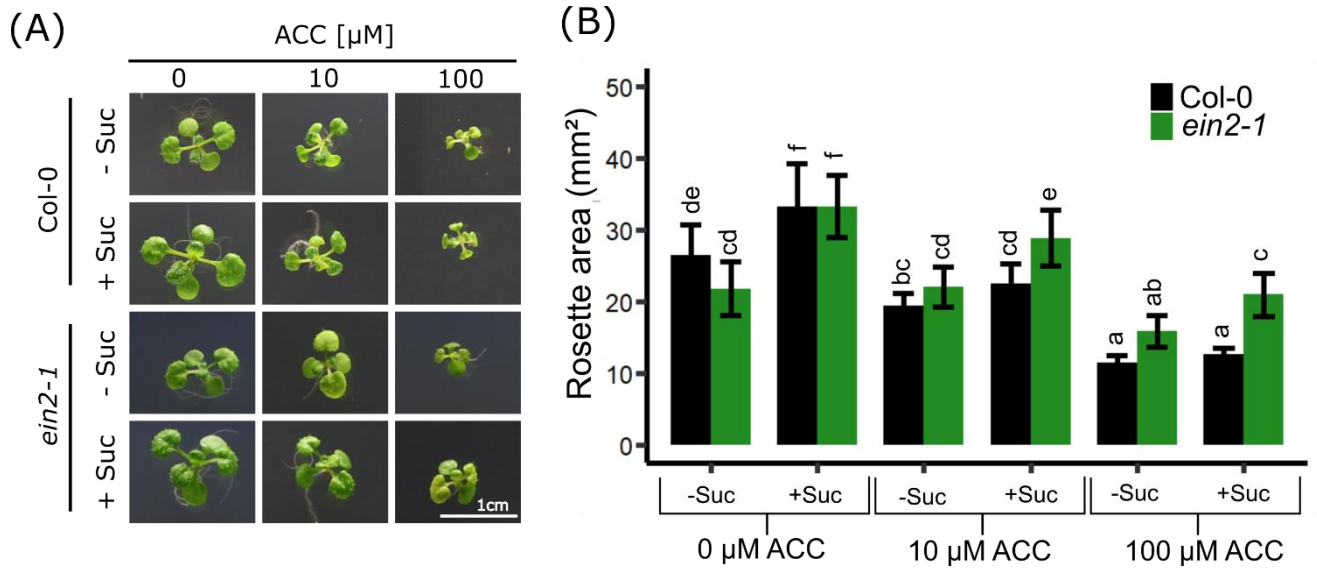

**Supplementary Figure 1. Effect of sucrose supplementation on rosette development of *Arabidopsis* wild-type Col-0 and ethylene insensitive *ein2-1* on increasing concentrations of ACC.** *Arabidopsis* wild-type Col-0 and ethylene insensitive mutant *ein2-1* were sown on 0, 10 and 100  $\mu\text{M}$  ACC with 0 % (-Suc) or 1 % sucrose (+Suc). (A) Pictures of representative 2-week-old plants under long-day conditions (16h light/8h dark) at light intensity of  $70 \mu\text{mol m}^{-2} \text{s}^{-1}$  at  $21^\circ\text{C}$ . (B) Rosette diameter of 2-week-old plants ( $44 \leq n \leq 90$ ). Different letters indicate statistically significant differences between the different groups (Three-way ANOVA, Tukey HSD,  $P < 0.01$ ). Error bars are SD. Effect sizes are presented in Table S1.

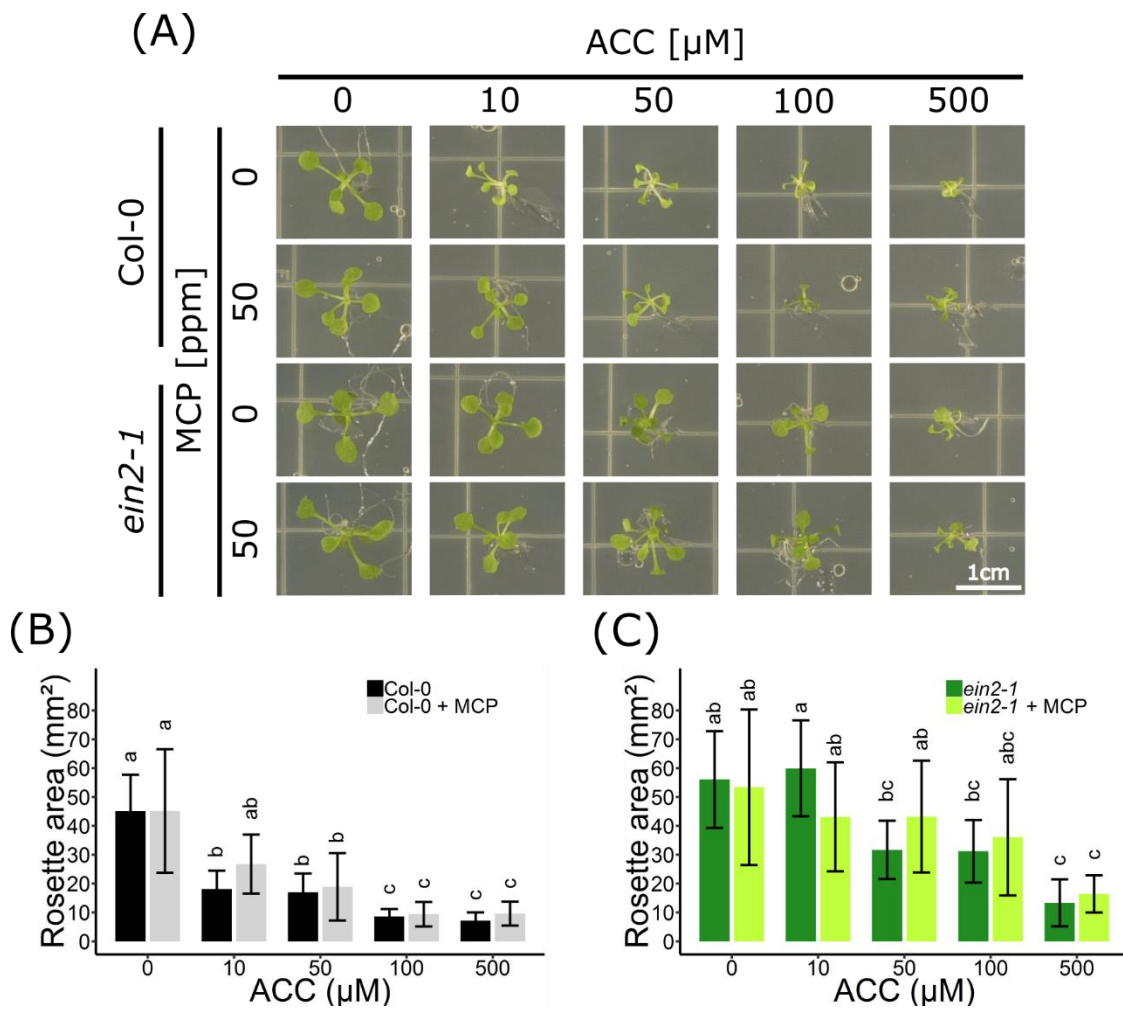

**Supplementary Figure 2. Rosette development of *Arabidopsis* wildtype Col-0 and ethylene insensitive *ein2-1* on increasing concentrations of ACC with and without 1-MCP treatment.** *Arabidopsis* wild-type Col-0 and ethylene insensitive mutant *ein2-1* were sown on 0, 10, 50, 100 and 500  $\mu\text{M}$  ACC with or without treatment with 50 ppm 1-MCP. (A) Pictures of representative 2-week-old plants under long-day conditions (16h light/8h dark) at light intensity of  $70 \mu\text{mol m}^{-2} \text{s}^{-1}$  at  $21^\circ\text{C}$ . (B) Rosette diameter of 2-week-old Col-0 plants ( $21 \leq n \leq 29$ ). (C) Rosette diameter of 2-week-old *ein2-1* plants ( $9 \leq n \leq 15$ ). Different letters indicate statistically significant differences between the different groups (Kruskal-Wallis, Dunn's Multiple Comparison Test,  $P < 0.01$ ). Error bars are SD.

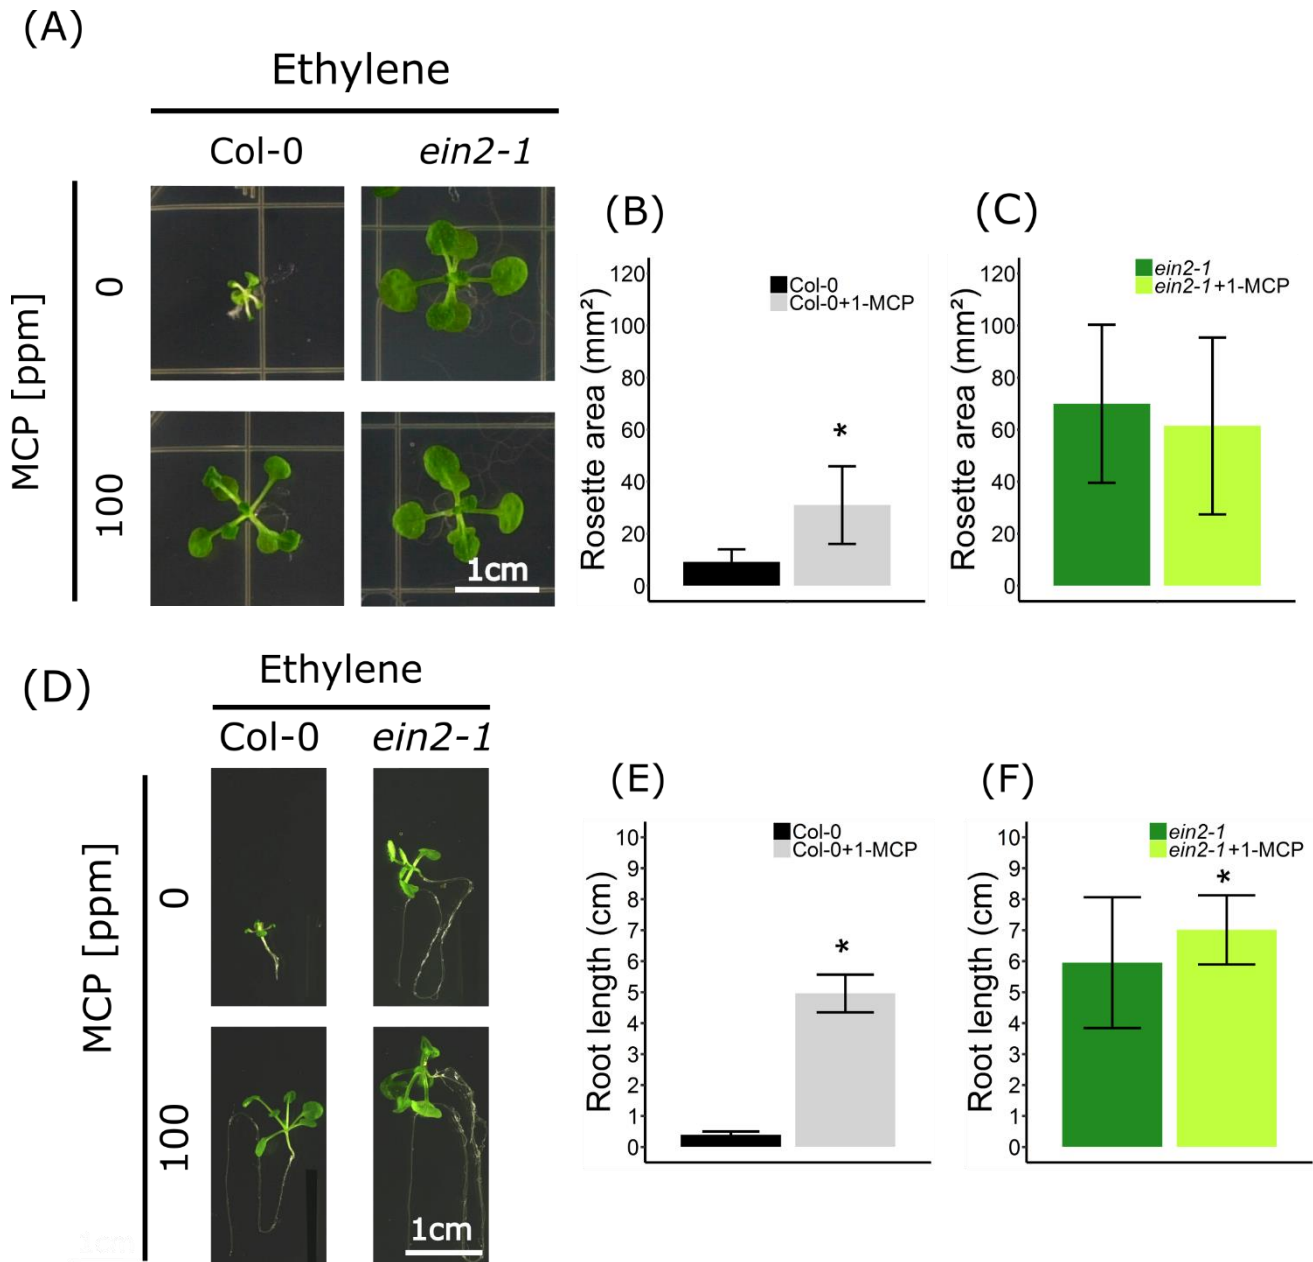

**Supplementary Figure 3. Rosette and root development of *Arabidopsis* wild-type Col-0 and ethylene insensitive *ein2-1* under 100 ppm ethylene with and without 1-MCP treatment.** *Arabidopsis* wild-type Col-0 and ethylene insensitive mutant *ein2-1* were grown in gassing chamber supplying 100 ppm ethylene with or without treatment with 100 ppm 1-MCP. (A) Pictures of representative horizontally grown 2-week-old plants under long-day conditions (16h light/8h dark) at light intensity of  $70 \mu\text{mol m}^{-2} \text{s}^{-1}$  at  $21^\circ\text{C}$ . (B) Rosette diameter of 2-week-old Col-0 plants ( $30 \leq n \leq 32$ ). (C) Rosette diameter of 2-week-old *ein2-1* plants ( $27 \leq n \leq 29$ ). (D) Pictures of representative vertically grown 2-week-old plants under long-day conditions (16h light/8h dark) at light intensity of  $70 \mu\text{mol m}^{-2} \text{s}^{-1}$  at  $21^\circ\text{C}$ . (E) Root length of 2-week-old Col-0 plants ( $37 \leq n \leq 39$ ). (F) Root length of 2-week-old *ein2-1* plants ( $29 \leq n \leq 36$ ). Statistical analysis was performed by use of a Mann-Whitney U Test (panels (B), (E) and (F),  $P < 0.01$ ) or a T-Test (Panel (C),  $P < 0.01$ ). Error bars are SD.

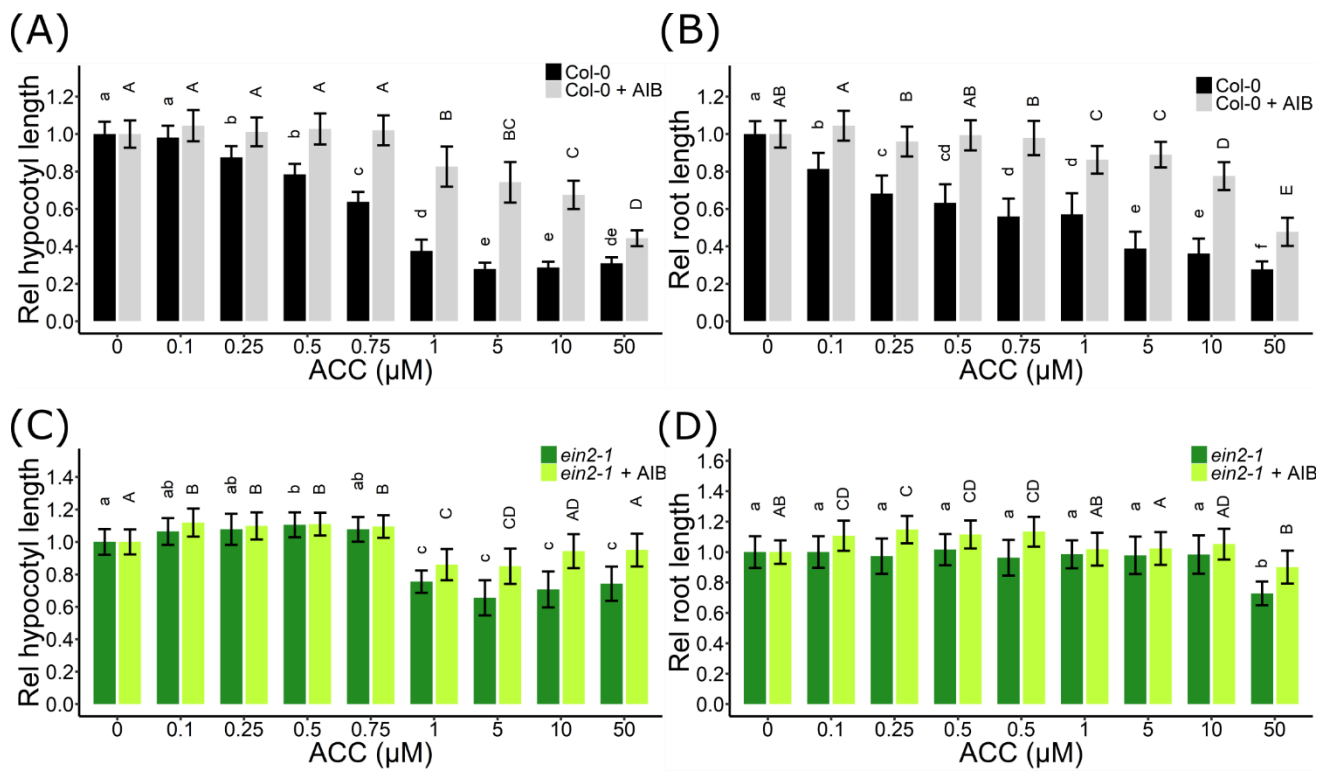

**Supplementary Figure 4. Triple response of *Arabidopsis* wild-type Col-0 and ethylene insensitive *ein2-1* on increasing concentrations of ACC with and without AIB treatment.** *Arabidopsis* wild-type Col-0 and ethylene insensitive mutant *ein2-1* were sown in darkness on 0, 0.1, 0.25, 0.5, 0.75, 1, 5, 10 and 50  $\mu\text{M}$  ACC with or without treatment with 2 mM AIB. **(A)** Relative hypocotyl length and **(B)** relative root length of Col-0 seedlings ( $38 \leq n \leq 55$ ; 3 independent replicates). **(C)** Relative hypocotyl length and **(D)** relative root length of *ein2-1* seedlings ( $22 \leq n \leq 42$ ; 3 independent replicates). Lengths are expressed relative to the average length of seedlings treated with 0  $\mu\text{M}$  ACC within each genotype and AIB concentration. Statistical analysis was conducted via Kruskal-Wallis and post hoc Dunn's Multiple Comparison Test ( $P < 0.01$ ) for each genotype and AIB treatment. Different letters represent significant differences. Error bars are SD.

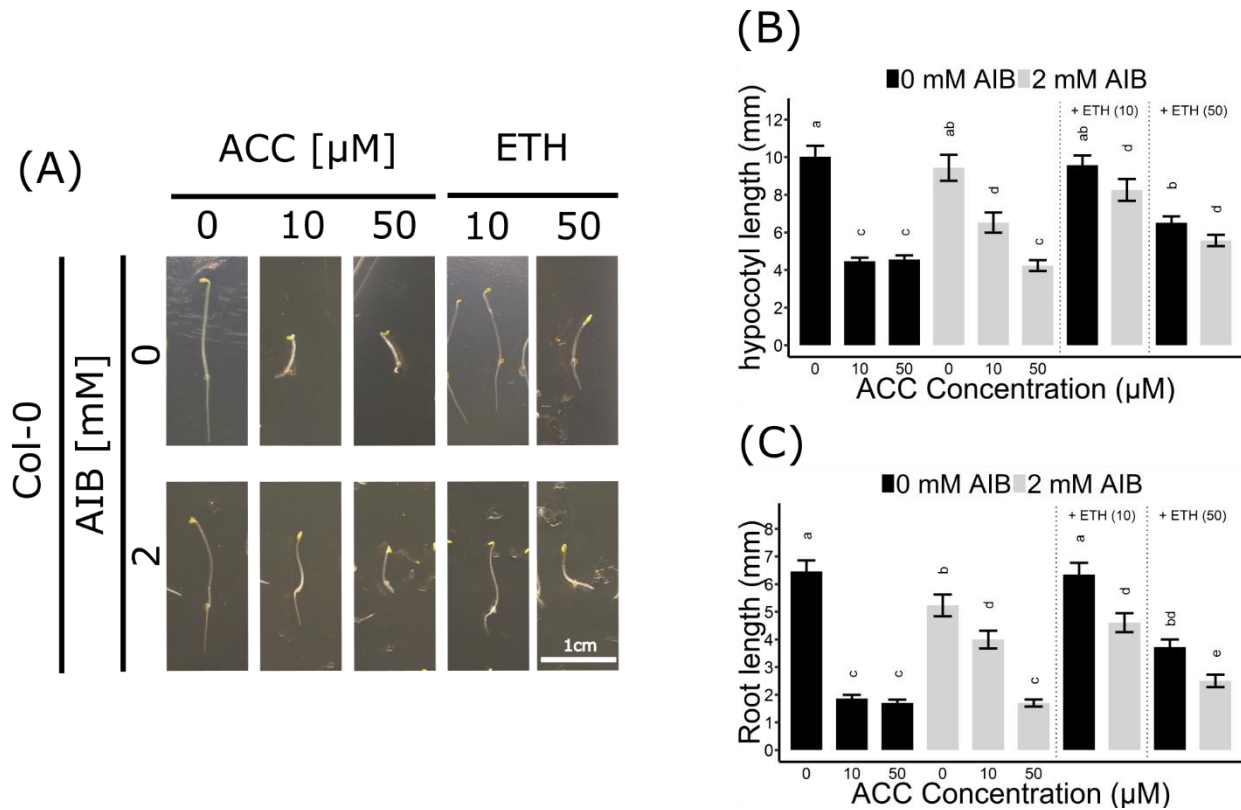

**Supplementary Figure 5. Ethylene effects on etiolated *Arabidopsis* wild-type Col-0 seedlings in the presence with AIB treatment.** *Arabidopsis* wild-type Col-0 were sown in darkness on 0, 10, and 50  $\mu\text{M}$  ACC with or without treatment with 2 mM AIB. In addition wild-type Col-0 were sown in the absence of ACC with or without AIB treatment (2 mM), and supplemented at germination with residual ethylene levels ETH (10) (= 116 ppb) or ETH (50) (= 585 ppb). (A) Pictures of representative 4-day-old etiolated Col-0 seedlings. (B) Hypocotyl length and (C) root length of Col-0 seedlings ( $n = 30$ ; 4 independent replicates). Different letters indicate statistically significant differences between the different groups (One-way ANOVA, Tukey HSD,  $P < 0.01$ ). Error bars are SD. Effect sizes are presented in Table S1.

## 1.2. Supplementary Tables

**Supplementary Table 1. Output of statistical analysis: effect sizes and p-values corresponding with statements made in the text. Small, medium and large effects correspond with effect sizes of 0.01, 0.06, and 0.15 for partial  $\eta^2$  or 0.1, 0.3 and  $>0.5$  for r.**

| Figure                                                                                                                                                                                        | Statement                                                                                                                                                                             | Comparison                                                 |                                                            | Effect size              | P-value  |
|-----------------------------------------------------------------------------------------------------------------------------------------------------------------------------------------------|---------------------------------------------------------------------------------------------------------------------------------------------------------------------------------------|------------------------------------------------------------|------------------------------------------------------------|--------------------------|----------|
| Figure 1B                                                                                                                                                                                     | <i>Compared to the mock treatment, 10 <math>\mu\text{M}</math> ACC already reduced rosette area severely</i>                                                                          | <b>Col-0 / 0 <math>\mu\text{M}</math> ACC</b>              | <b>Col-0 / 10 <math>\mu\text{M}</math> ACC</b>             | r = 0.56                 | p < 0.01 |
|                                                                                                                                                                                               |                                                                                                                                                                                       | Mean = 42.59 mm <sup>2</sup><br>SD = 12.76 mm <sup>2</sup> | Mean = 18.258 mm <sup>2</sup><br>SD = 6.59 mm <sup>2</sup> |                          |          |
|                                                                                                                                                                                               | <i>A saturated response was visible as of 100 <math>\mu\text{M}</math> ACC</i>                                                                                                        | <b>Col-0 / 0 <math>\mu\text{M}</math> ACC</b>              | <b>Col-0 / 100 <math>\mu\text{M}</math> ACC</b>            | r = 1.06                 | p < 0.01 |
|                                                                                                                                                                                               |                                                                                                                                                                                       | Mean = 42.59 mm <sup>2</sup><br>SD = 12.76 mm <sup>2</sup> | Mean = 8.07 mm <sup>2</sup><br>SD = 2.15 mm <sup>2</sup>   |                          |          |
| <i>At 10 <math>\mu\text{M}</math> ACC, ein2-1 rosette size was slightly larger compared to a treatment with 0 <math>\mu\text{M}</math> ACC.</i>                                               | <b>ein2-1 / 0 <math>\mu\text{M}</math> ACC</b>                                                                                                                                        | <b>ein2-1 / 10 <math>\mu\text{M}</math> ACC</b>            | r = 0.12                                                   | p = 0.58                 |          |
|                                                                                                                                                                                               | Mean = 47.57 mm <sup>2</sup><br>SD = 14.49 mm <sup>2</sup>                                                                                                                            | Mean = 57.39 mm <sup>2</sup><br>SD = 14.28 mm <sup>2</sup> |                                                            |                          |          |
| <i>Contrarily, at 100 <math>\mu\text{M}</math> ACC, the mean rosette area was decreased</i>                                                                                                   | <b>ein2-1 / 0 <math>\mu\text{M}</math> ACC</b>                                                                                                                                        | <b>ein2-1 / 100 <math>\mu\text{M}</math> ACC</b>           | r = 0.49                                                   | p = 0.02                 |          |
|                                                                                                                                                                                               | Mean = 47.57 mm <sup>2</sup><br>SD = 14.49 mm <sup>2</sup>                                                                                                                            | Mean = 23.95 mm <sup>2</sup><br>SD = 11.70 mm <sup>2</sup> |                                                            |                          |          |
| Figure S1B                                                                                                                                                                                    | <i>In general, the omission of sucrose supplementation in the growth medium resulted in a decrease in rosette area in both Col-0 and ein2-1 and irrespective of ACC concentration</i> | <b>Sucrose effect in three-way ANOVA analysis</b>          |                                                            | partial $\eta^2$ = 0.039 | p < 0.01 |
| <i>In the absence of ACC, a lack of sucrose resulted in a small inhibitory effect on rosette area in Col-0 and large decrease in ein2-1</i>                                                   | <b>Col-0 / 0 <math>\mu\text{M}</math> ACC / +Suc</b>                                                                                                                                  | <b>Col-0 / 0 <math>\mu\text{M}</math> ACC / -Suc</b>       | r = 0.33                                                   | p < 0.01                 |          |
|                                                                                                                                                                                               | Mean = 33.24 mm <sup>2</sup><br>SD = 11.98 mm <sup>2</sup>                                                                                                                            | Mean = 26.43 mm <sup>2</sup><br>SD = 8.71 mm <sup>2</sup>  |                                                            |                          |          |
| <i>However, at high concentrations of ACC (e.g. 100 <math>\mu\text{M}</math>) rosette area of Col-0 and ein2-1 was reduced severely, irrespective of the presence of sucrose</i>              | <b>ein2-1 / 0 <math>\mu\text{M}</math> ACC / +Suc</b>                                                                                                                                 | <b>ein2-1 / 0 <math>\mu\text{M}</math> ACC / -Suc</b>      | r = 0.62                                                   | p < 0.01                 |          |
|                                                                                                                                                                                               | Mean = 33.29 mm <sup>2</sup><br>SD = 8.56 mm <sup>2</sup>                                                                                                                             | Mean = 22.14 mm <sup>2</sup><br>SD = 7.65 mm <sup>2</sup>  |                                                            |                          |          |
| <i>For instance, in ein2-1, 100 <math>\mu\text{M}</math> ACC decreased rosette area with 5.88 mm<sup>2</sup> and 12.30 mm<sup>2</sup> in the absence or presence of sucrose, respectively</i> | <b>ein2-1 / 0 <math>\mu\text{M}</math> ACC / -Suc</b>                                                                                                                                 | <b>ein2-1 / 100 <math>\mu\text{M}</math> ACC / -Suc</b>    | r = 0.51                                                   | p < 0.01                 |          |
|                                                                                                                                                                                               | Mean = 22.14 mm <sup>2</sup><br>SD = 7.65 mm <sup>2</sup>                                                                                                                             | Mean = 15.93 mm <sup>2</sup><br>SD = 4.43 mm <sup>2</sup>  |                                                            |                          |          |
|                                                                                                                                                                                               | <b>ein2-1 / 0 <math>\mu\text{M}</math> ACC / +Suc</b>                                                                                                                                 | <b>ein2-1 / 100 <math>\mu\text{M}</math> ACC / +Suc</b>    | r = 0.66                                                   | p < 0.01                 |          |
|                                                                                                                                                                                               | Mean = 33.29 mm <sup>2</sup><br>SD = 8.56 mm <sup>2</sup>                                                                                                                             | Mean = 20.99 mm <sup>2</sup><br>SD = 5.99 mm <sup>2</sup>  |                                                            |                          |          |
| <b>ACC effect in three-way ANOVA analysis</b>                                                                                                                                                 |                                                                                                                                                                                       | partial $\eta^2$ = 0.123                                   | p < 0.01                                                   |                          |          |

|           |                                                                                                                                                                               |                                                                                                                                                               |                                                                                                                                                                |                          |            |
|-----------|-------------------------------------------------------------------------------------------------------------------------------------------------------------------------------|---------------------------------------------------------------------------------------------------------------------------------------------------------------|----------------------------------------------------------------------------------------------------------------------------------------------------------------|--------------------------|------------|
| Figure 1C | When ethylene perception was blocked with 250 ppm 1-MCP, Col-0 rosettes were slightly larger compared to mock-treated rosettes, though this increase was negligible           | <b>0 ppm 1-MCP / Col-0 / 0 <math>\mu</math>M ACC</b><br>Mean = 42.59 mm <sup>2</sup><br>SD = 12.76 mm <sup>2</sup>                                            | <b>250 ppm 1-MCP / Col-0 / 0 <math>\mu</math>M ACC</b><br>Mean = 44.78 mm <sup>2</sup><br>SD = 18.29 mm <sup>2</sup>                                           | $r = 0.01$               | $p = 0.93$ |
|           | On 10 $\mu$ M ACC, MCP-treated rosettes reached 30.01 mm <sup>2</sup> compared to 0 $\mu$ M ACC, while 100 $\mu$ M ACC further decreased rosette area to 8.72 mm <sup>2</sup> | <b>250 ppm 1-MCP / Col-0 / 0 <math>\mu</math>M ACC</b><br>Mean = 44.78 mm <sup>2</sup><br>SD = 18.29 mm <sup>2</sup>                                          | <b>250 ppm 1-MCP / Col-0 / 10 <math>\mu</math>M ACC</b><br>Mean = 30.01 mm <sup>2</sup><br>SD = 8.52 mm <sup>2</sup>                                           | $r = 0.19$               | $p = 0.25$ |
|           |                                                                                                                                                                               | <b>250 ppm 1-MCP / Col-0 / 0 <math>\mu</math>M ACC</b><br>Mean = 44.78 mm <sup>2</sup><br>SD = 18.29 mm <sup>2</sup>                                          | <b>250 ppm 1-MCP / Col-0 / 100 <math>\mu</math>M ACC</b><br>Mean = 8.72 mm <sup>2</sup><br>SD = 3.80 mm <sup>2</sup>                                           | $r = 1.04$               | $p < 0.01$ |
| Figure 1D | Furthermore, 1-MCP did not substantially change the response of ein2-1 to increasing concentrations of ACC                                                                    | <b>1-MCP effect in two-way ANOVA analysis</b>                                                                                                                 |                                                                                                                                                                | partial $\eta^2 < 0.001$ | $p = 0.94$ |
| Figure 2B | Both ACC and 1-MCP dramatically altered root growth                                                                                                                           | <b>ACC effect in two-way ANOVA analysis</b>                                                                                                                   |                                                                                                                                                                | partial $\eta^2 = 0.922$ | $p < 0.01$ |
|           |                                                                                                                                                                               | <b>1-MCP effect in two-way ANOVA analysis</b>                                                                                                                 |                                                                                                                                                                | partial $\eta^2 = 0.542$ | $p < 0.01$ |
|           | In the absence of 1-MCP, a reduction in root length was already apparent at 10 $\mu$ M ACC                                                                                    | <b>0 ppm 1-MCP / Col-0 / 0 <math>\mu</math>M ACC</b><br>Mean = 83.07 mm<br>SD = 16.71 mm                                                                      | <b>0 ppm 1-MCP / Col-0 / 10 <math>\mu</math>M ACC</b><br>Mean = 15.02 mm<br>SD = 6.67 mm                                                                       | $r = 0.61$               | $p < 0.01$ |
|           | In contrast, at the same concentration of ACC in the presence of 1-MCP, a much smaller inhibition was observed (Fig. 2B; Table S1).                                           | <b>250 ppm 1-MCP / Col-0 / 0 <math>\mu</math>M ACC</b><br>Mean = 90.65 mm<br>SD = 19.83 mm                                                                    | <b>250 ppm 1-MCP / Col-0 / 10 <math>\mu</math>M ACC</b><br>Mean = 60.67 mm<br>SD = 14.22 mm                                                                    | $r = 0.24$               | $p = 0.03$ |
|           | A 5-fold higher dose was required for an effective inhibition of root elongation                                                                                              | <b>250 ppm 1-MCP / Col-0 / 0 <math>\mu</math>M ACC</b><br>Mean = 90.65 mm<br>SD = 19.83 mm                                                                    | <b>250 ppm 1-MCP / Col-0 / 50 <math>\mu</math>M ACC</b><br>Mean = 23.53 mm<br>SD = 8.96 mm                                                                     | $r = 0.53$               | $p < 0.01$ |
| Figure 3A | A dose-dependent increase in ethylene levels was observed when plants were grown on ACC-containing media                                                                      | <b>ACC effect in two-way ANOVA analysis</b>                                                                                                                   |                                                                                                                                                                | partial $\eta^2 = 0.889$ | $p < 0.01$ |
|           | In addition, AIB effectively blocked ACO-mediated conversion of ACC to ethylene                                                                                               | <b>AIB effect in two-way ANOVA analysis</b>                                                                                                                   |                                                                                                                                                                | partial $\eta^2 = 0.860$ | $p < 0.01$ |
|           | though a small increase in ethylene levels, could be observed at higher concentrations                                                                                        | <b>0 <math>\mu</math>M ACC / 2 mM AIB</b><br>Mean = 0.0038 pL seedling <sup>-1</sup> h <sup>-1</sup><br>SD = 0.0003 pL seedling <sup>-1</sup> h <sup>-1</sup> | <b>50 <math>\mu</math>M ACC / 2 mM AIB</b><br>Mean = 0.0200 pL seedling <sup>-1</sup> h <sup>-1</sup><br>SD = 0.0023 pL seedling <sup>-1</sup> h <sup>-1</sup> | $r = 0.75$               | $p < 0.01$ |
|           | Nevertheless, the ethylene levels in plants treated with 50 $\mu$ M ACC + AIB were more than two-fold lower than those in plants treated with 1 $\mu$ M ACC alone             | <b>1 <math>\mu</math>M ACC / 0 mM AIB</b><br>Mean = 0.0502 pL seedling <sup>-1</sup> h <sup>-1</sup><br>SD = 0.0107 pL seedling <sup>-1</sup> h <sup>-1</sup> | <b>50 <math>\mu</math>M ACC / 2 mM AIB</b><br>Mean = 0.0200 pL seedling <sup>-1</sup> h <sup>-1</sup><br>SD = 0.0023 pL seedling <sup>-1</sup> h <sup>-1</sup> | $r = 0.22$               | $p = 0.44$ |
| Figure 3C | The addition of 2 mM AIB resulted in a slight decrease                                                                                                                        | <b>Col-0 / 0 <math>\mu</math>M ACC / 2 mM AIB</b>                                                                                                             | <b>Col-0 / 50 <math>\mu</math>M ACC / 2 mM AIB</b>                                                                                                             | $r = 0.18$               | $p = 0.11$ |



|           |                                                                                                                                                                                                                                                             |                                                                                                                                                                                                                                    |                                                                                                                                                                                                                                      |                          |                      |
|-----------|-------------------------------------------------------------------------------------------------------------------------------------------------------------------------------------------------------------------------------------------------------------|------------------------------------------------------------------------------------------------------------------------------------------------------------------------------------------------------------------------------------|--------------------------------------------------------------------------------------------------------------------------------------------------------------------------------------------------------------------------------------|--------------------------|----------------------|
|           | <i>in rosette area upon 50 <math>\mu</math>M ACC</i>                                                                                                                                                                                                        | Mean = 26.96 mm <sup>2</sup><br>SD = 7.12 mm <sup>2</sup>                                                                                                                                                                          | Mean = 23.73 mm <sup>2</sup><br>SD = 6.03 mm <sup>2</sup>                                                                                                                                                                            |                          |                      |
|           | <i>Since the application of 50 <math>\mu</math>M ACC + AIB led to ethylene levels lower than those observed upon 1 <math>\mu</math>M ACC alone (Fig. 3A), and the inhibitory effect of the latter dose was relatively small for both rosettes and roots</i> | <b>Col-0 / 0 <math>\mu</math>M ACC / 0 mM AIB</b><br>Mean = 29.40 mm <sup>2</sup><br>SD = 6.37 mm <sup>2</sup>                                                                                                                     | <b>Col-0 / 1 <math>\mu</math>M ACC / 0 mM AIB</b><br>Mean = 29.72 mm <sup>2</sup><br>SD = 7.12 mm <sup>2</sup>                                                                                                                       | r = 0.21                 | p = 0.015            |
| Figure 3D | <i>In ein2-1 plantlets, 50 <math>\mu</math>M ACC decreased rosette size substantially in the absence of AIB. However, in the presence of 2 mM AIB, rosette area reduced only slightly upon treatment with 50 <math>\mu</math>M ACC</i>                      | <b>ein2-1 / 0 <math>\mu</math>M ACC / 0 mM AIB</b><br>Mean = 27.25 mm <sup>2</sup><br>SD = 5.02 mm <sup>2</sup><br><b>ein2-1 / 0 <math>\mu</math>M ACC / 2 mM AIB</b><br>Mean = 24.00 mm <sup>2</sup><br>SD = 5.66 mm <sup>2</sup> | <b>ein2-1 / 50 <math>\mu</math>M ACC / 0 mM AIB</b><br>Mean = 16.84 mm <sup>2</sup><br>SD = 4.64 mm <sup>2</sup><br><b>ein2-1 / 50 <math>\mu</math>M ACC / 2 mM AIB</b><br>Mean = 20.54 mm <sup>2</sup><br>SD = 4.92 mm <sup>2</sup> | r = 0.73<br>r = 0.31     | p < 0.01<br>p = 0.03 |
| Figure 4B | <i>In Col-0, 50 <math>\mu</math>M ACC decreased the average root length from 39.17 mm to 5.57 mm in the absence of AIB.</i>                                                                                                                                 | <b>Col-0 / 0 <math>\mu</math>M ACC / 0 mM AIB</b><br>Mean = 39.17 mm<br>SD = 7.37 mm                                                                                                                                               | <b>Col-0 / 50 <math>\mu</math>M ACC / 0 mM AIB</b><br>Mean = 5.57 mm<br>SD = 4.29 mm                                                                                                                                                 | r = 1.31                 | p < 0.01             |
|           | <i>In the presence of AIB, root length was decreased from 22.37 mm to 5.35 mm</i>                                                                                                                                                                           | <b>Col-0 / 0 <math>\mu</math>M ACC / 2 mM AIB</b><br>Mean = 22.37 mm<br>SD = 5.67 mm                                                                                                                                               | <b>Col-0 / 50 <math>\mu</math>M ACC / 2 mM AIB</b><br>Mean = 5.35 mm<br>SD = 1.77 mm                                                                                                                                                 | r = 0.86                 | p < 0.01             |
|           | <i>Since the application of 50 <math>\mu</math>M ACC + AIB led to ethylene levels lower than those observed upon 1 <math>\mu</math>M ACC alone (Fig. 3A), and the inhibitory effect of the latter dose was relatively small for both rosettes and roots</i> | <b>Col-0 / 0 <math>\mu</math>M ACC / 0 mM AIB</b><br>Mean = 39.17 mm<br>SD = 7.37 mm                                                                                                                                               | <b>Col-0 / 1 <math>\mu</math>M ACC / 0 mM AIB</b><br>Mean = 22.78 mm<br>SD = 6.90 mm                                                                                                                                                 | r = 0.43                 | p < 0.01             |
| Figure 4C | <i>Likewise, 50 <math>\mu</math>M ACC reduced root elongation substantially in ein2-1 both without and with AIB supplementation</i>                                                                                                                         | <b>ein2-1 / 0 <math>\mu</math>M ACC / 0 mM AIB</b><br>Mean = 33.06 mm<br>SD = 7.14 mm<br><b>ein2-1 / 0 <math>\mu</math>M ACC / 2 mM AIB</b><br>Mean = 19.69 mm<br>SD = 3.97 mm                                                     | <b>ein2-1 / 50 <math>\mu</math>M ACC / 0 mM AIB</b><br>Mean = 12.44 mm<br>SD = 3.74 mm<br><b>ein2-1 / 50 <math>\mu</math>M ACC / 2 mM AIB</b><br>Mean = 8.25 mm<br>SD = 1.86 mm                                                      | r = 0.94<br>r = 0.66     | p < 0.01<br>p < 0.01 |
| Figure 5C | <i>In Col-0, a dose-dependent inhibition of hypocotyl elongation was observed</i>                                                                                                                                                                           | <b>ACC effect in two-way ANOVA analysis</b>                                                                                                                                                                                        |                                                                                                                                                                                                                                      | partial $\eta^2$ = 0.729 | p < 0.01             |
|           | <i>For instance, 1 <math>\mu</math>M ACC reduced the average hypocotyl length from 10.88 mm to 4.08 mm, while in the presence of AIB, it only decreased from 9.81 mm to 8.11 mm</i>                                                                         | <b>Col-0 / 0 <math>\mu</math>M ACC / 0 mM AIB</b><br>Mean = 10.88 mm<br>SD = 1.44 mm<br><b>Col-0 / 0 <math>\mu</math>M ACC / 2 mM AIB</b><br>Mean = 9.81 mm<br>SD = 1.48 mm                                                        | <b>Col-0 / 1 <math>\mu</math>M ACC / 0 mM AIB</b><br>Mean = 4.08 mm<br>SD = 1.29 mm<br><b>Col-0 / 1 <math>\mu</math>M ACC / 2 mM AIB</b><br>Mean = 8.11 mm<br>SD = 2.07 mm                                                           | r = 1.08<br>r = 0.29     | p < 0.01<br>p < 0.01 |
|           | <i>In contrast, 50 <math>\mu</math>M ACC strongly inhibited hypocotyl length, irrespective of AIB treatment</i>                                                                                                                                             | <b>Col-0 / 0 <math>\mu</math>M ACC / 0 mM AIB</b><br>Mean = 10.88 mm<br>SD = 1.44 mm<br><b>Col-0 / 0 <math>\mu</math>M ACC / 2 mM AIB</b>                                                                                          | <b>Col-0 / 50 <math>\mu</math>M ACC / 0 mM AIB</b><br>Mean = 3.37 mm<br>SD = 0.70 mm<br><b>Col-0 / 50 <math>\mu</math>M ACC / 2 mM AIB</b>                                                                                           | r = 1.19<br>r = 0.84     | p < 0.01<br>p < 0.01 |

|            |                                                                                                                                                                                                                |                                                                                       |                                                                                        |                          |          |
|------------|----------------------------------------------------------------------------------------------------------------------------------------------------------------------------------------------------------------|---------------------------------------------------------------------------------------|----------------------------------------------------------------------------------------|--------------------------|----------|
|            |                                                                                                                                                                                                                | Mean = 9.81 mm<br>SD = 1.48 mm                                                        | Mean = 4.34 mm<br>SD = 0.80 mm                                                         |                          |          |
|            | <i>Given that in Col-0, 10 and 50 <math>\mu</math>M ACC in the presence of AIB resulted in stronger inhibitory effects compared to 0.1 and 0.75 <math>\mu</math>M ACC, respectively, in the absence of AIB</i> | <b>Col-0 / 0 <math>\mu</math>M ACC / 2 mM AIB</b><br>Mean = 9.81 mm<br>SD = 1.48 mm   | <b>Col-0 / 10 <math>\mu</math>M ACC / 2 mM AIB</b><br>Mean = 4.34 mm<br>SD = 0.80 mm   | r = 0.54                 | p < 0.01 |
|            |                                                                                                                                                                                                                | <b>Col-0 / 0 <math>\mu</math>M ACC / 0 mM AIB</b><br>Mean = 10.88 mm<br>SD = 1.44 mm  | <b>Col-0 / 0.1 <math>\mu</math>M ACC / 0 mM AIB</b><br>Mean = 10.66 mm<br>SD = 1.40 mm | r = 0.03                 | p = 0.61 |
|            |                                                                                                                                                                                                                | <b>Col-0 / 0 <math>\mu</math>M ACC / 0 mM AIB</b><br>Mean = 10.88 mm<br>SD = 1.44 mm  | <b>Col-0 / 0.75 <math>\mu</math>M ACC / 0 mM AIB</b><br>Mean = 6.93 mm<br>SD = 1.15 mm | r = 0.70                 | p < 0.01 |
|            |                                                                                                                                                                                                                |                                                                                       |                                                                                        |                          |          |
| Figure 5D  | <i>In Col-0, a dose-dependent inhibition of root elongation was observed</i>                                                                                                                                   | <b>ACC effect in two-way ANOVA analysis</b>                                           |                                                                                        | partial $\eta^2$ = 0.523 | p < 0.01 |
|            | <i>Given that in Col-0, 10 and 50 <math>\mu</math>M ACC in the presence of AIB resulted in stronger inhibitory effects compared to 0.1 and 0.75 <math>\mu</math>M ACC, respectively, in the absence of AIB</i> | <b>Col-0 / 0 <math>\mu</math>M ACC / 2 mM AIB</b><br>Mean = 5.49 mm<br>SD = 0.79 mm   | <b>Col-0 / 10 <math>\mu</math>M ACC / 2 mM AIB</b><br>Mean = 4.26 mm<br>SD = 0.82 mm   | r = 0.44                 | p < 0.01 |
|            |                                                                                                                                                                                                                | <b>Col-0 / 0 <math>\mu</math>M ACC / 2 mM AIB</b><br>Mean = 5.49 mm<br>SD = 0.79 mm   | <b>Col-0 / 50 <math>\mu</math>M ACC / 2 mM AIB</b><br>Mean = 2.62 mm<br>SD = 0.82 mm   | r = 1.11                 | p < 0.01 |
|            |                                                                                                                                                                                                                | <b>Col-0 / 0 <math>\mu</math>M ACC / 0 mM AIB</b><br>Mean = 7.41 mm<br>SD = 1.02 mm   | <b>Col-0 / 0.1 <math>\mu</math>M ACC / 0 mM AIB</b><br>Mean = 5.74 mm<br>SD = 0.87 mm  | r = 0.30                 | p < 0.01 |
|            |                                                                                                                                                                                                                | <b>Col-0 / 0 <math>\mu</math>M ACC / 0 mM AIB</b><br>Mean = 7.41 mm<br>SD = 1.02 mm   | <b>Col-0 / 0.75 <math>\mu</math>M ACC / 0 mM AIB</b><br>Mean = 5.38 mm<br>SD = 1.02    | r = 0.86                 | p < 0.01 |
|            | <i>In darkness, Col-0 and ein2-1 roots were approximately 25% shorter when treated with 2 mM AIB</i>                                                                                                           | <b>Col-0 / 0 <math>\mu</math>M ACC / 0 mM AIB</b><br>Mean = 7.41 mm<br>SD = 1.02 mm   | <b>Col-0 / 0 <math>\mu</math>M ACC / 2 mM AIB</b><br>Mean = 5.49 mm<br>SD = 0.79 mm    | r = 0.42                 | p < 0.01 |
| Figure 5E  | <i>At 50 <math>\mu</math>M ACC and in the absence of AIB, hypocotyl length was merely reduced from 11.46 mm to 8.57 mm</i>                                                                                     | <b>ein2-1 / 0 <math>\mu</math>M ACC / 0 mM AIB</b><br>Mean = 11.46 mm<br>SD = 1.85 mm | <b>ein2-1 / 50 <math>\mu</math>M ACC / 0 mM AIB</b><br>Mean = 8.57 mm<br>SD = 2.41 mm  | r = 0.58                 | p < 0.01 |
| Figure 5F  | <i>In darkness, Col-0 and ein2-1 roots were approximately 25% shorter when treated with 2 mM AIB</i>                                                                                                           | <b>ein2-1 / 0 <math>\mu</math>M ACC / 0 mM AIB</b><br>Mean = 6.19 mm<br>SD = 1.31 mm  | <b>ein2-1 / 0 <math>\mu</math>M ACC / 2 mM AIB</b><br>Mean = 4.76 mm<br>SD = 0.74 mm   | r = 0.59                 | p < 0.01 |
| Figure 5SB | <i>When seedlings were treated with ETH (10), hypocotyls and roots were almost indistinguishable from the mock treatment</i>                                                                                   | <b>0 <math>\mu</math>M ACC / 0 mM AIB</b><br>Mean = 10.03 mm<br>SD = 1.15 mm          | <b>ETH (10) / 0 mM AIB</b><br>Mean = 9.57 mm<br>SD = 1.03 mm                           | r = 0.06                 | p = 0.35 |
|            | <i>In the presence of 2 mM AIB, the effect of ETH (10) was slightly larger in both organs</i>                                                                                                                  | <b>0 <math>\mu</math>M ACC / 2 mM AIB</b><br>Mean = 9.43 mm<br>SD = 1.38 mm           | <b>ETH (10) / 2 mM AIB</b><br>Mean = 8.25 mm<br>SD = 1.15 mm                           | r = 0.17                 | p = 0.04 |
|            | <i>However, the effect of 10 <math>\mu</math>M ACC + AIB on hypocotyl and</i>                                                                                                                                  | <b>0 <math>\mu</math>M ACC / 2 mM AIB</b><br>Mean = 9.43 mm                           | <b>10 <math>\mu</math>M ACC / 2 mM AIB</b><br>Mean = 6.52 mm                           | r = 0.51                 | p < 0.01 |

|           |                                                                                                                                            |                                                           |                                                            |          |          |
|-----------|--------------------------------------------------------------------------------------------------------------------------------------------|-----------------------------------------------------------|------------------------------------------------------------|----------|----------|
|           | <i>root elongation was stronger than that of ETH (10)</i>                                                                                  | SD = 1.38 mm                                              | SD = 1.06 mm                                               |          |          |
| Figure 6B | <i>Etiolated <b>acs8x</b> seedlings exhibited significantly longer hypocotyls and shorter roots compared to the wild-type</i>              | <b>Col-0 / 0 mM AIB</b><br>Mean = 9.69 mm<br>SD = 1.33 mm | <b>acs8x / 0 mM AIB</b><br>Mean = 11.29 mm<br>SD = 0.79 mm | r = 0.58 | p < 0.01 |
| Figure 6C | <i>Etiolated <b>acs8x</b> seedlings exhibited significantly longer hypocotyls and shorter roots compared to the wild-type</i>              | <b>Col-0 / 0 mM AIB</b><br>Mean = 6.32 mm<br>SD = 1.06 mm | <b>acs8x / 0 mM AIB</b><br>Mean = 5.64 mm<br>SD = 0.98 mm  | r = 0.46 | p < 0.01 |
|           | <i>Upon addition of 2 mM AIB, both wild-type and <b>acs8x</b> roots were 30 % shorter compared to roots in absence of AIB (Fig. 6C, E)</i> | <b>Col-0 / 0 mM AIB</b><br>Mean = 6.32 mm<br>SD = 1.06 mm | <b>Col-0 / 2 mM AIB</b><br>Mean = 4.63 mm<br>SD = 0.75 mm  | r = 0.67 | p < 0.01 |
|           |                                                                                                                                            | <b>acs8x / 0 mM AIB</b><br>Mean = 5.64 mm<br>SD = 0.98 mm | <b>acs8x / 2 mM AIB</b><br>Mean = 4.10 mm<br>SD = 0.82 mm  | r = 0.67 | p < 0.01 |

**Supplementary Table 2. Average ethylene emanation (SD) of 2-week-old light grown *Arabidopsis* wild-type Col-0 seedlings treated with ACC, AIB or a combination of both.**

| <b>Treatment<br/>ACC</b>    | <b>Treatment<br/>0 mM AIB<br/>(in pL/h/plant)</b> | <b>Treatment<br/>2 mM AIB<br/>(in pL/h/plant)</b> |
|-----------------------------|---------------------------------------------------|---------------------------------------------------|
| <b>0 <math>\mu</math>M</b>  | 5.25 (2.42)                                       | 3.73 (0.31)                                       |
| <b>1 <math>\mu</math>M</b>  | 50.26 (10.76)                                     | 4.17 (0.54)                                       |
| <b>10 <math>\mu</math>M</b> | 117.78 (20.15)                                    | 6.19 (0.62)                                       |
| <b>50 <math>\mu</math>M</b> | 259.92 (38.41)                                    | 20.07 (2.31)                                      |

**Supplementary Table 3. Average ethylene emanation (SD) of etiolated 4-day-old *Arabidopsis* wild-type Col-0 seedlings treated with ACC, AIB or a combination of both.**

| <b>Treatment<br/>ACC</b>      | <b>Treatment<br/>0 mM AIB<br/>(in pL/h/seedling)</b> | <b>Treatment<br/>2 mM AIB<br/>(in pL/h/seedling)</b> |
|-------------------------------|------------------------------------------------------|------------------------------------------------------|
| <b>0 <math>\mu</math>M</b>    | 0.29 (0.21)                                          | 0.14 (0.08)                                          |
| <b>0.1 <math>\mu</math>M</b>  | 1.00 (0.13)                                          | 0.20 (0.06)                                          |
| <b>0.25 <math>\mu</math>M</b> | 2.23 (0.14)                                          | 0.18 (0.09)                                          |
| <b>0.5 <math>\mu</math>M</b>  | 2.87 (1.93)                                          | 0.06 (0.01)                                          |
| <b>0.75 <math>\mu</math>M</b> | 5.96 (0.67)                                          | 0.27 (0.13)                                          |
| <b>1 <math>\mu</math>M</b>    | 12.73 (0.86)                                         | 0.32 (0.08)                                          |
| <b>5 <math>\mu</math>M</b>    | 59.29 (3.28)                                         | 0.97 (0.18)                                          |
| <b>10 <math>\mu</math>M</b>   | 90.75 (3.71)                                         | 1.29 (0.16)                                          |
| <b>50 <math>\mu</math>M</b>   | 176.18 (59.87)                                       | 6.50 (0.52)                                          |
